# Supplementary material
Source: PubMed Central journal article supplement (PMC3057894)
Supplement: NIHMS276365-supplement-Fig_S1.pdf [file NIHMS276365-supplement-Fig_S1.pdf]

NOD.Rag2<sup>-/-</sup>

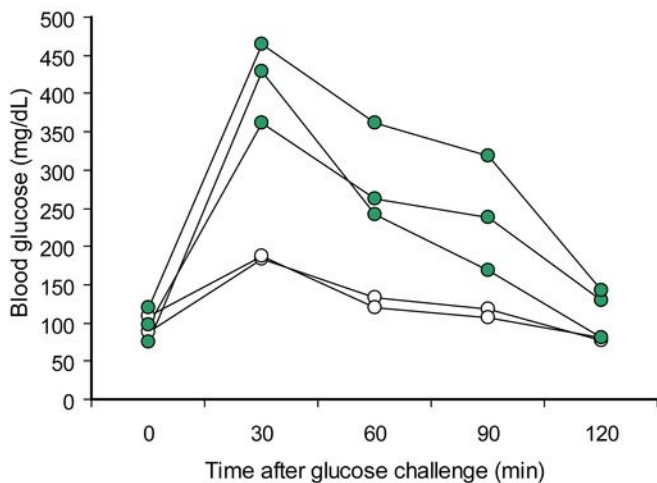

C57Bl/6

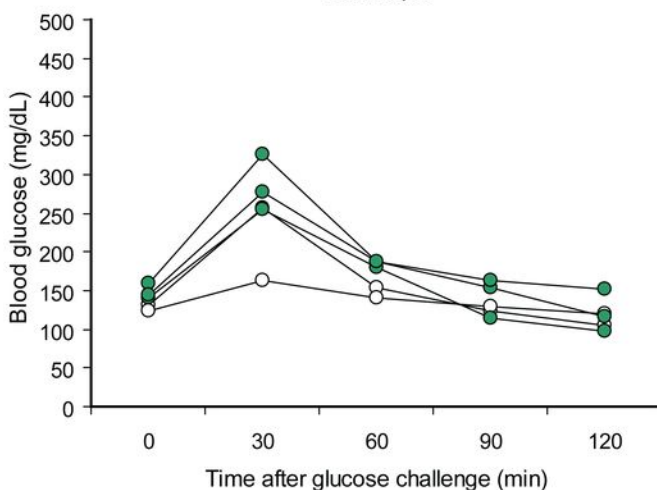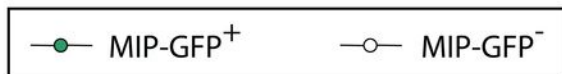

Figure S1. Intraperitoneal glucose tolerance tests of NOD.MIP-GFP.Rag2<sup>-/-</sup> (Top) or C57Bl/6.MIP-GFP (Bottom) mice. Filled symbols represent MIP-GFP<sup>+</sup> mice and open symbols represent MIP-GFP<sup>-</sup> mice. Each line represents an individual mouse of the indicated genotype.
