# Supplementary material
Source: PubMed Central journal article supplement (PMC3057894)
Supplement: NIHMS276365-supplement-Fig_S2.pdf [file NIHMS276365-supplement-Fig_S2.pdf]

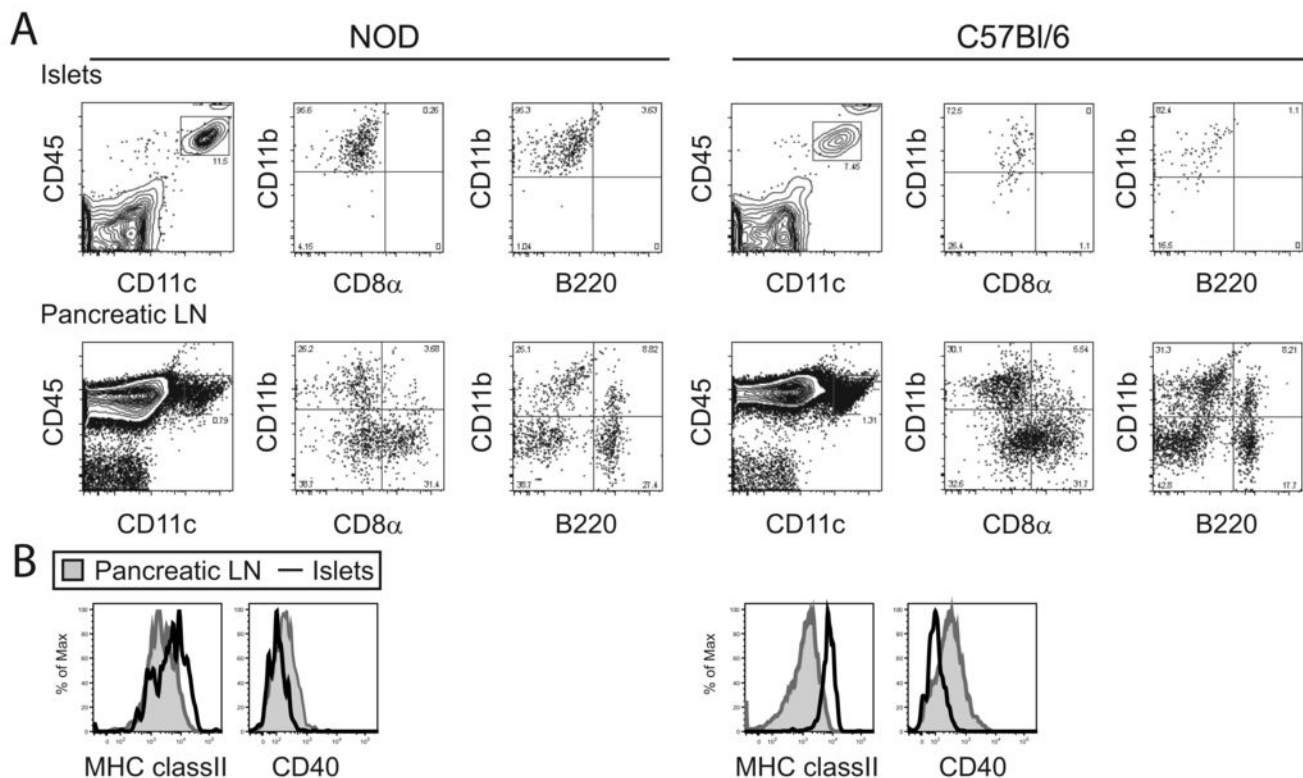

Figure S2. Phenotype of intra-islet DCs in young NOD and C57BL/6 mice. Single cell suspension of islets and PLNs isolated from 3 week old NOD or 4 week old B6 mice were analyzed by flow cytometry to determine the cell surface markers expressed by intra-islet DCs. (A). Characterization of subtypes of intra-islet DCs. Events shown are gated on live cells (DAPI<sup>-</sup>) (B). Expression of MHC class II and CD40 on intra-islet DCs (gated on CD45<sup>+</sup>DAPI<sup>-</sup>CD11c<sup>+</sup> cells, bold lines) in comparison with DCs in the PLN (shaded histograms). The result is representative of two independent experiments in each of the mouse strains.
