# Supplementary material
Source: PubMed Central journal article supplement (PMC3057894)
Supplement: NIHMS276365-supplement-Fig_S3.pdf [file NIHMS276365-supplement-Fig_S3.pdf]

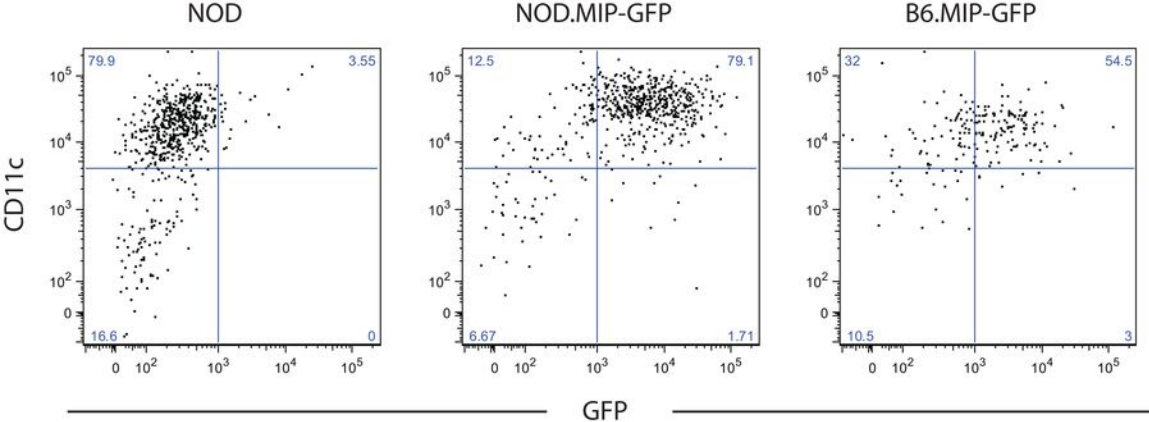

Figure S3. Intra-islet DCs in MIP-GFP transgenic mice acquire and maintain intact GFP. Flow cytometric analysis of GFP expression by intra-islet DCs in 3 week old NOD (left), 3 week old NOD.MIP-GFP (middle) and 4 week old B6.MIP-GFP (right) mice. Events shown are gated on CD45<sup>+</sup>DAPI<sup>-</sup> cells. The result is representative of two independent experiments.
